# Supplementary material
Source: publisher figshare collection journal article supplement (https://karger.figshare.com/ndownloader/files/13867004)
Supplement: Supplementary file 1 [file 13867004]

| Online Supplementary Table 1 - Assessment of studies' risk of bias through Newcastle–Ottawa Scale criteria for cohort studies. | | | | | | | | | |
| --- | --- | --- | --- | --- | --- | --- | --- | --- | --- |
|  | **Selection** | | | | **Comparability** | | **Outcome** | | | | | |  | |
| Studies | **Representativeness quality score**  **of exposed cohort** | **Selection of the non-exposed cohort from same source as exposed cohort** | **Ascertainment of exposure** | **Outcome of Interest**  **was not present at**  **start of study** | | **Comparability of cohorts** | | **Assessment of outcome** | **Follow-up long enough for outcome to occur** | | **Adequacy of follow-up** | **Quality score** | |
| Li Y et al [57] | Institutional study with the largest number of participants and longest time-frame | Yes | Prospective database | Yes | | Not matched  (Only X2 and Fisher test analysis) | | Prospective database | Yes | | Yes | **Poor** | |
| Heerasing N et al [58] | Institutional study with a small number of participants  in the exposed cohort | Cohorts’ data selection from different sources: dietitian database *vs* diagnostic coding data | Dietitian database | Yes | | Matched for age at diagnosis, disease duration and behaviour, and type of surgery | | Electronic and physical medical records and case notes | Yes | | Yes | **Fair** | |
| Beaupel N et al [59] | Institutional study with a small number of participants | Yes | Prospective database | Yes | | Not matched  (Only X2 and Fisher test analysis) | | Prospective database | Yes | | Yes | **Poor** | |
| Zhu Y et al [60] | Institutional study with a small number of participants  mainly in the non-exposed cohort | Yes | Electronic medical records | Yes | | Not matched  (Only X2 and Fisher test analysis) | | Electronic medical records | Yes | | Yes | **Poor** | |

**Good quality -** 3 or 4 stars in selection domain AND 1 or 2 stars in comparability domain AND 2 or 3 stars in outcome domain; **fair quality -** 2 stars in selection domain AND 1 or 2 stars in comparability domain AND 2 or 3 stars in

outcome domain; **poor quality -** 0 or 1 star in selection domain OR 0 stars in comparability domain OR 0 or 1 stars in outcome domain.
